# Supplementary material
Source: PubMed Central journal article supplement (PMC5865394)
Supplement: NIHMS950436-supplement-Supplemental_Table.pdf [file NIHMS950436-supplement-Supplemental_Table.pdf]

Supplementary Table 1. Hourly step number, cadence, minutes of low and moderate activity per hour (no vigorous activity was detected for this participant), and number of breaks in sedentary time throughout one day for a sample participant.

| Time | Step # | Cadence (steps/min) |          | Activity (min) |     | Sedentary Break # |
|------|--------|---------------------|----------|----------------|-----|-------------------|
|      |        | Median              | IQR      | LPA            | MPA |                   |
| 7am  | 402    | 85                  | 74 to 91 | 4              | 1   | 3                 |
| 8am  | 796    | 74                  | 54 to 89 | 9              | 3   | 3                 |
| 9am  | 1306   | 81                  | 56 to 98 | 8              | 5   | 11                |
| 10am | 1136   | 64                  | 52 to 76 | 13             | 2   | 9                 |
| 11am | 668    | 60                  | 52 to 71 | 6              | 2   | 6                 |
| 12pm | 1444   | 62                  | 50 to 80 | 16             | 2   | 7                 |
| 1pm  | 830    | 61                  | 54 to 80 | 9              | 2   | 4                 |
| 2pm  | 1342   | 56                  | 51 to 74 | 17             | 1   | 7                 |
| 3pm  | 988    | 58                  | 51 to 71 | 12             | 0   | 14                |
| 4pm  | 1728   | 65                  | 54 to 80 | 17             | 3   | 12                |
| 5pm  | 832    | 53                  | 45 to 76 | 10             | 2   | 13                |
| 6pm  | 974    | 75                  | 58 to 87 | 10             | 1   | 4                 |
| 7pm  | 424    | 69                  | 54 to 82 | 4              | 0   | 4                 |
| 8pm  | 196    | 58                  | 54 to 75 | 2              | 0   | 1                 |
| 9pm  | 314    | 81                  | 54 to 95 | 3              | 1   | 0                 |
| 10pm | 98     | 61                  | 50 to 76 | 1              | 0   | 0                 |
| 11pm | 412    | 74                  | 60 to 84 | 7              | 1   | 5                 |
| 12pm | 512    | 63                  | 54 to 75 | 10             | 1   | 8                 |
